# Supplementary material
Source: publisher figshare collection journal article supplement (https://microbiology.figshare.com/articles/dataset/_/28748756)
Supplement: Supplementary file [file 1]

1 **Supplementary Figures**

2 **Genomic-based taxonomic classification of the order *Sphingomonadales***

3 Yuan Wang<sup>1,2,†</sup>, Hao You<sup>1,2,†</sup>, Yan-Hui Kong<sup>1,3</sup>, Cong Sun<sup>4</sup>, Lin-Huan Wu<sup>5</sup>, Song-Gun  
4 Kim<sup>6</sup>, Jung-Sook Lee<sup>6</sup>, Lin Xu<sup>4,\*</sup>, Xue-Wei Xu<sup>7,\*</sup>

5 <sup>1</sup>Key Laboratory of Marine Ecosystem Dynamics, Ministry of Natural Resources &  
6 Second Institute of Oceanography, Ministry of Natural Resources, Hangzhou 310012,  
7 PR China

8 <sup>2</sup>School of Oceanography, Zhejiang University, Zhoushan 316021, PR China

9 <sup>3</sup>School of Oceanography, Shanghai Jiao Tong University, Shanghai 200030, PR China

10 <sup>4</sup>College of Life Sciences and Medicine, Zhejiang Sci-Tech University, Hangzhou  
11 310018, PR China

12 <sup>5</sup>Institute of Microbiology Chinese Academy of Sciences, Beijing 100101, PR China

13 <sup>6</sup>Korea Research Institute of Bioscience and Biotechnology, Korean Collection for Type  
14 Cultures, Jeongeup 56212, Republic of Korea

15 <sup>7</sup>National Deep Sea Center, Ministry of Natural Resources, Qingdao 266237, PR China

16

17 <sup>†</sup>These authors contributed equally.

18 <sup>\*</sup>Correspondence: Lin Xu (linxu@zstu.edu.cn); Xue-Wei Xu (xuxw@sio.org.cn)

19 **Figure S1.** The maximum-likelihood tree based on 16S rRNA gene sequences showing  
 20 the phylogenetic relationship of Sphingomonadales type strains. Bootstrap values are  
 21 based on 1,000 replicates; only bootstrap values 0.7 are shown. Bar, 0.01 substitutions  
 22 per nucleotide position. Red, yellow, blue and purple represent the family  
 23 *Erythrobacteraceae*, *Sphingomonadaceae*, *Sphingosinicellaceae* and  
 24 *Zymomonadaceae*, respectively. *Rhodospirillum rubrum* ATCC 11170<sup>T</sup> was used as an  
 25 outgroup.

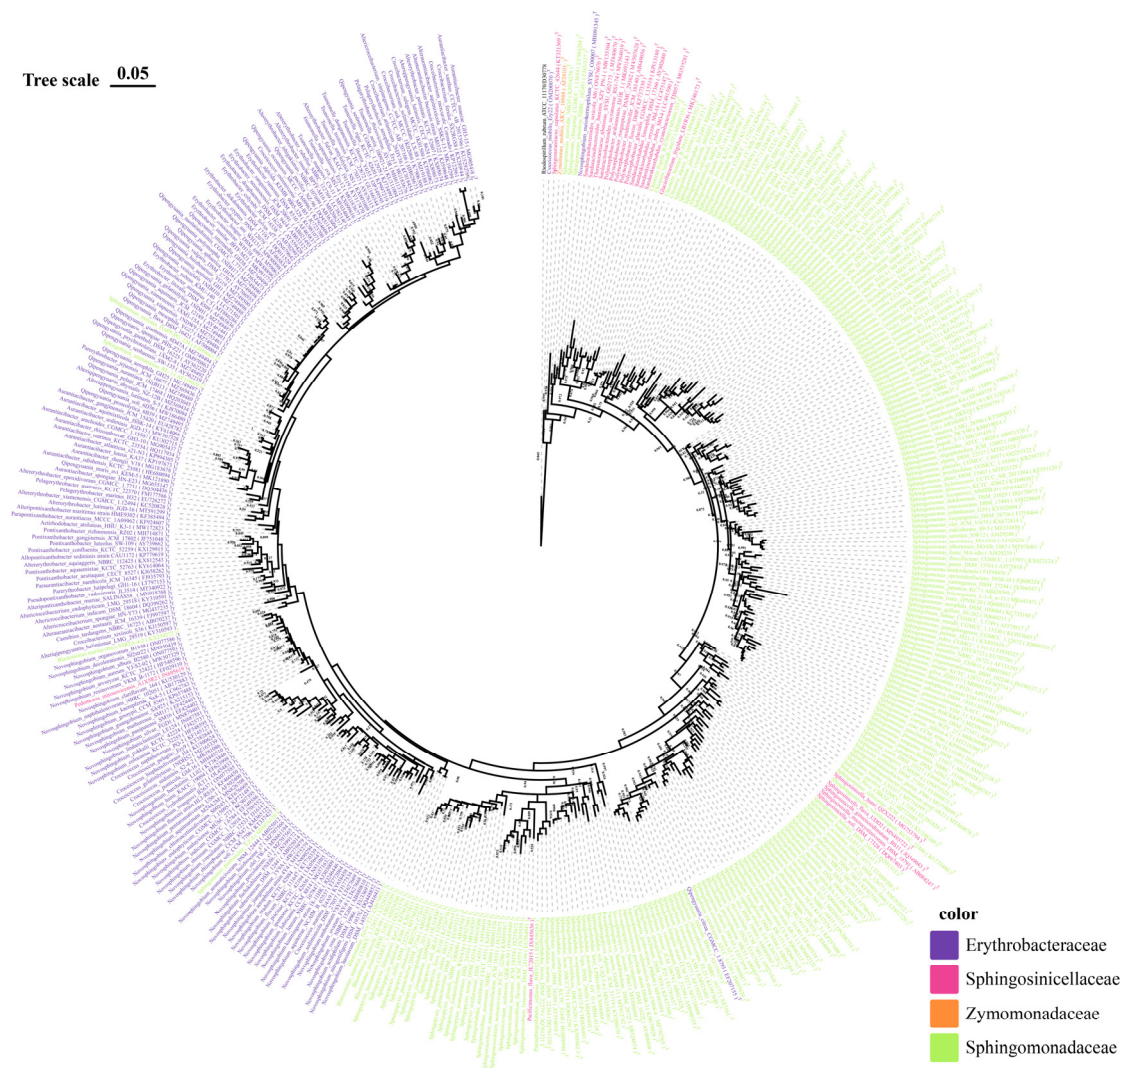

26

27 **Figure S2.** Maximum-likelihood tree based on 120 concatenated protein sequences  
 28 showing the phylogenetic relationship of type strains belonging to the order  
 29 *Sphingomonadales*. Bootstrap values are based on 1000 replicates. Bar. 0.1  
 30 substitutions per amino acid position. *Rhodospirillum rubrum* ATCC 11170<sup>T</sup> was used  
 31 as an outgroup.

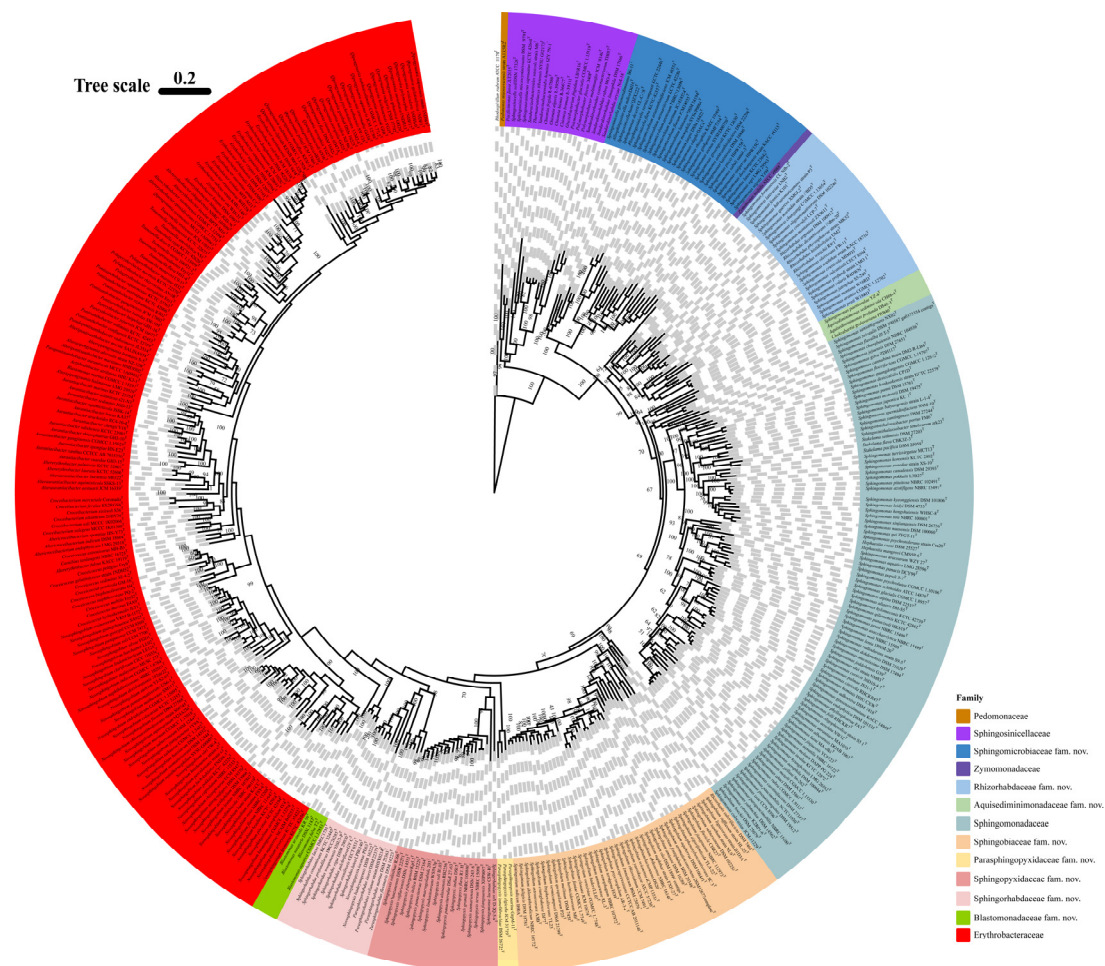

**Figure S3.** Maximum-likelihood tree based on 22 concatenated protein sequences showing the phylogenetic relationship of type strains belonging to the order *Sphingomonadales*. Bootstrap values are based on 1000 replicates. Bar. 0.1 substitutions per amino acid position. *Rhodospirillum rubrum* ATCC 11170<sup>T</sup> was used as an outgroup.

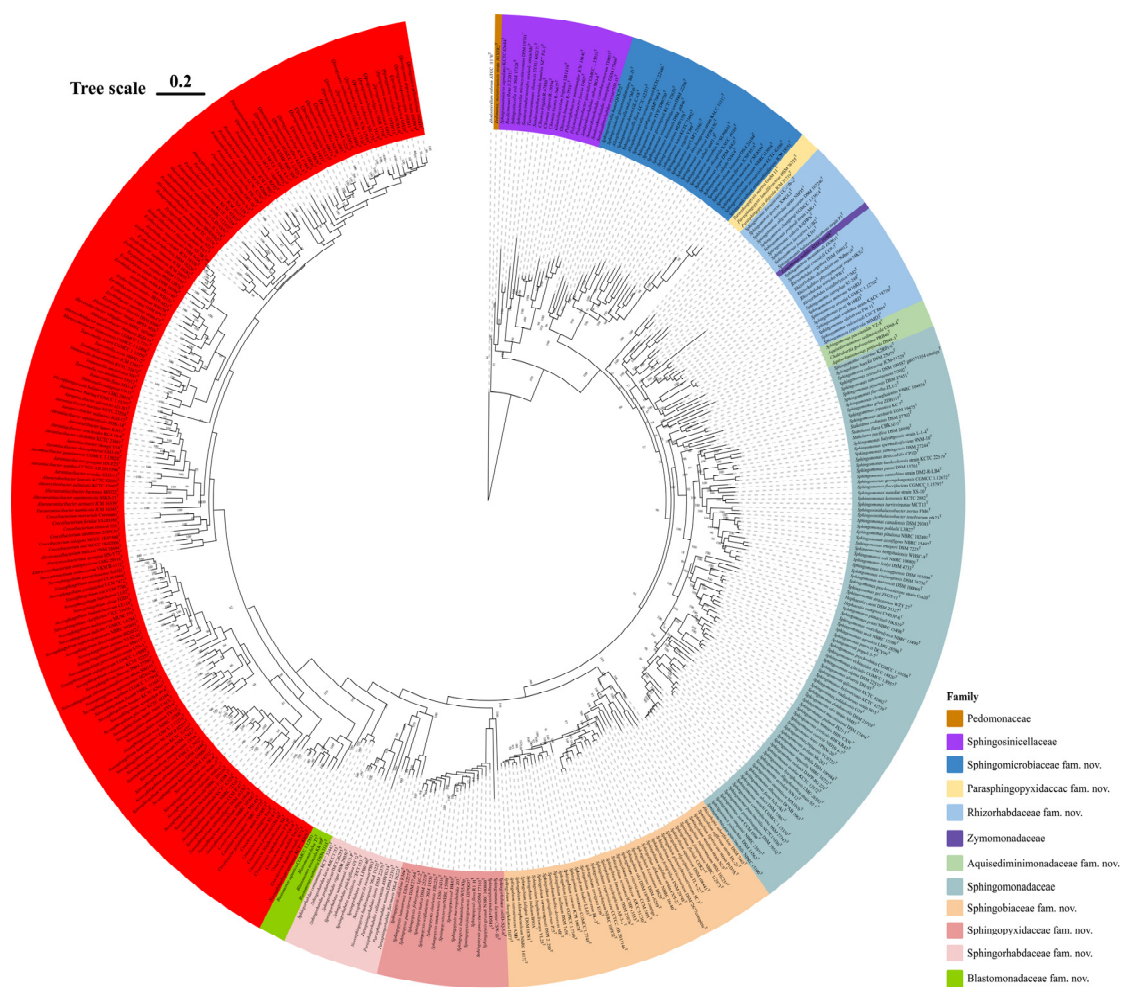

38



39 **Figure S4.** Bayesian tree based on 120 concatenated protein sequences showing the  
 40 phylogenetic relationship of type strains belonging to the order *Sphingomonadales*.  
 41 Bootstrap values are based on 1000 replicates. Bar. 0.1 substitutions per amino acid  
 42 position. *Rhodospirillum rubrum* ATCC 11170<sup>T</sup> was used as an outgroup.

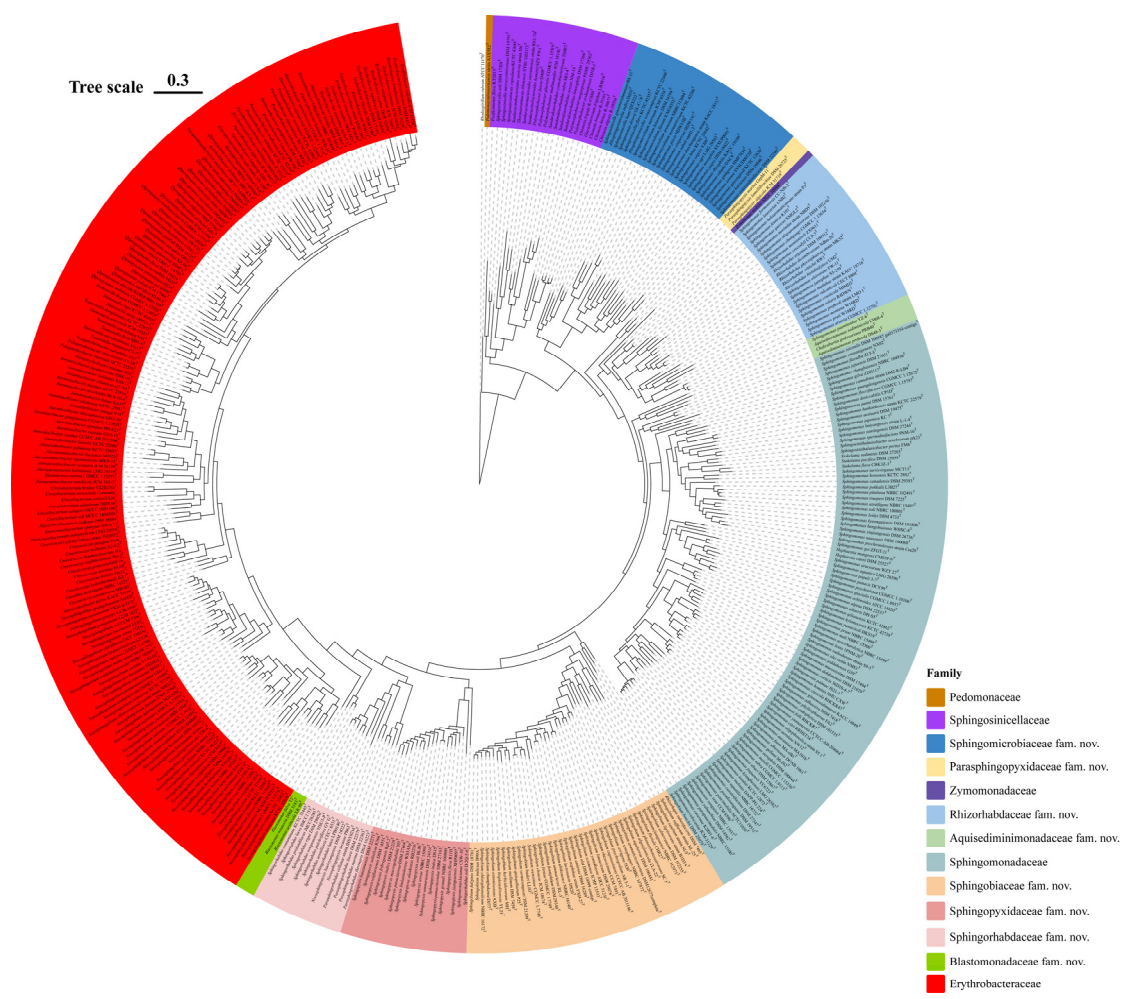

44 **Figure S5.** Bayesian tree based on 22 concatenated protein sequences showing the  
 45 phylogenetic relationship of type strains belonging to the order *Sphingomonadales*.  
 46 Bootstrap values are based on 1000 replicates. Bar. 0.1 substitutions per amino acid  
 47 position. *Rhodospirillum rubrum* ATCC 11170<sup>T</sup> was used as an outgroup.

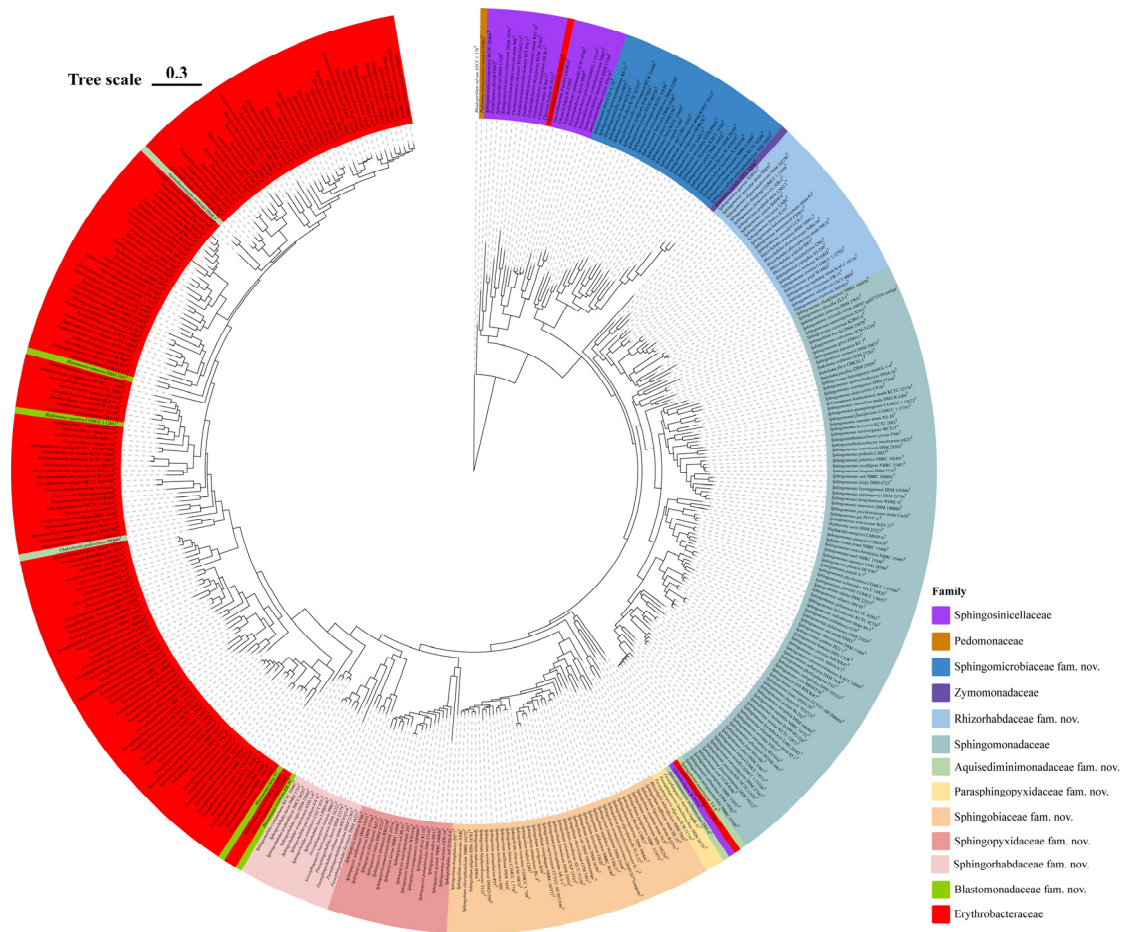

48
